# Supplementary material for: Fe3O4 nanoparticles entrapped in the inner surfaces of N-doped carbon microtubes with enhanced biomimetic activity
Source: Royal Society of Chemistry journal article supplement (doi:10.1039/d3dt04310j), 2024-01-01
Supplement: d3dt04310j1.pdf [file d3dt04310j1.pdf]

## Supporting Information

### **Fe<sub>3</sub>O<sub>4</sub> Nanoparticles entrapped in the inner Surfaces of N-doped Carbon microtubes with enhanced biomimetic activity**

Huanhuan Li<sup>a</sup>, Ziqi Jin<sup>a</sup>, Na Lu<sup>b\*</sup>, Jianmin Pan<sup>a</sup>, Jingli Xu<sup>a</sup>, Xue-Bo Yin<sup>a</sup>, Min Zhang<sup>a\*</sup>

<sup>a</sup>College of Chemistry and Chemical Engineering, Shanghai University of Engineering Science, Shanghai 201620, China. zhangmin@sues.edu.cn.

<sup>b</sup>College of Materials Science and Engineering, Shanghai University of Engineering Science, Shanghai, 201620, China. E-mail: nlu2014@163.com

#### **Synthesis of MoO<sub>3</sub>@PPy@FeOOH and NCMTs@Fe<sub>3</sub>O<sub>4</sub>**

The preparation of MoO<sub>3</sub>@PPy@FeOOH was based on a similar method for synthesizing MoO<sub>3</sub>@FeOOH. Then, the as-synthesized MoO<sub>3</sub>@PPy@FeOOH (50 mg) and ammonia aqueous solution (1 mL) were dispersed in 20 mL deionized water. After stirring for 10 min, the products were collected and washed with water and ethanol for several times and then dried at 60 °C overnight. Subsequently, the obtained PPy@FeOOH microtubes were annealed at 700 °C temperatures under N<sub>2</sub> gas for 5 h to obtain the NCMTs@Fe<sub>3</sub>O<sub>4</sub> composites.

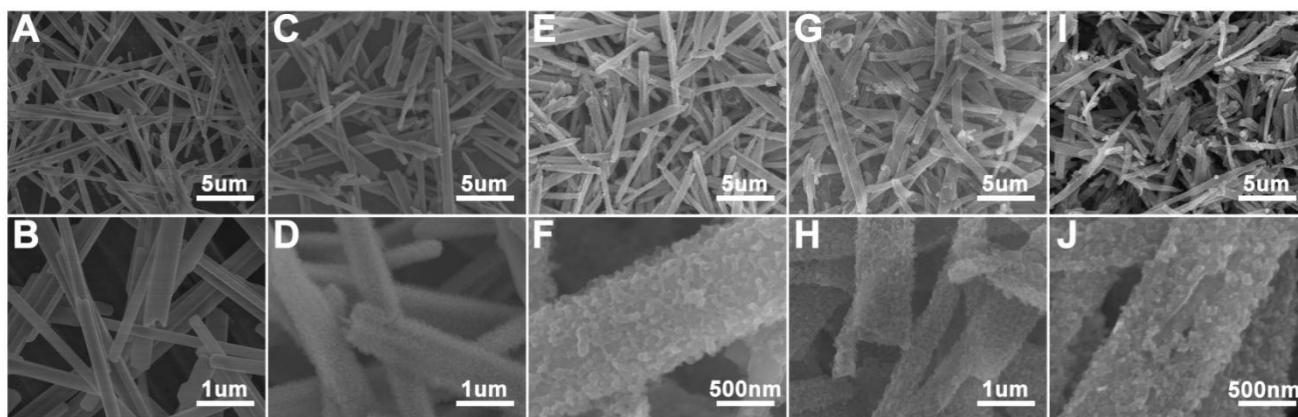

**Fig. S1.** SEM images of MoO<sub>3</sub> (A, B), MoO<sub>3</sub>@FeOOH (C, D), MoO<sub>3</sub>@FeOOH@PPy (E, F), FeOOH@PPy (G, H), and Fe<sub>3</sub>O<sub>4</sub>@NCMTs-700 (I, J).

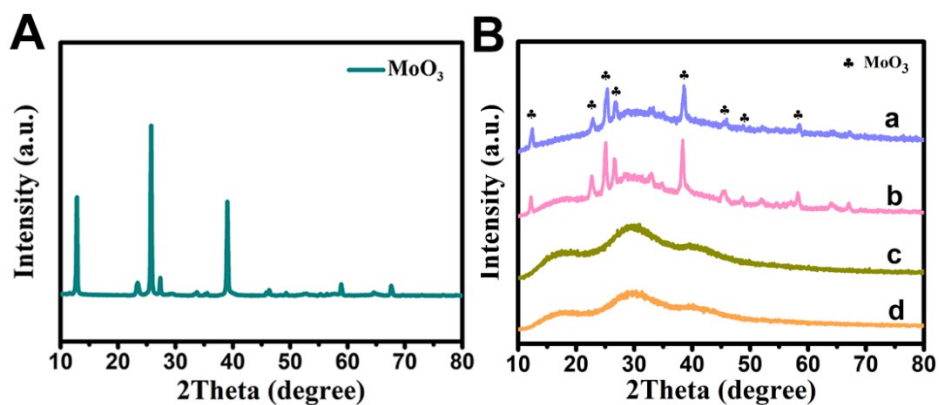

**Fig. S2.** XRD patterns of different products: (A)  $\text{MoO}_3$ , (B)  $\text{MoO}_3@FeOOH$ (a),  $\text{MoO}_3@FeOOH@PPy$ (b),  $FeOOH@PPy$ (c),  $Fe_3O_4@NCMTs-700$ (d).

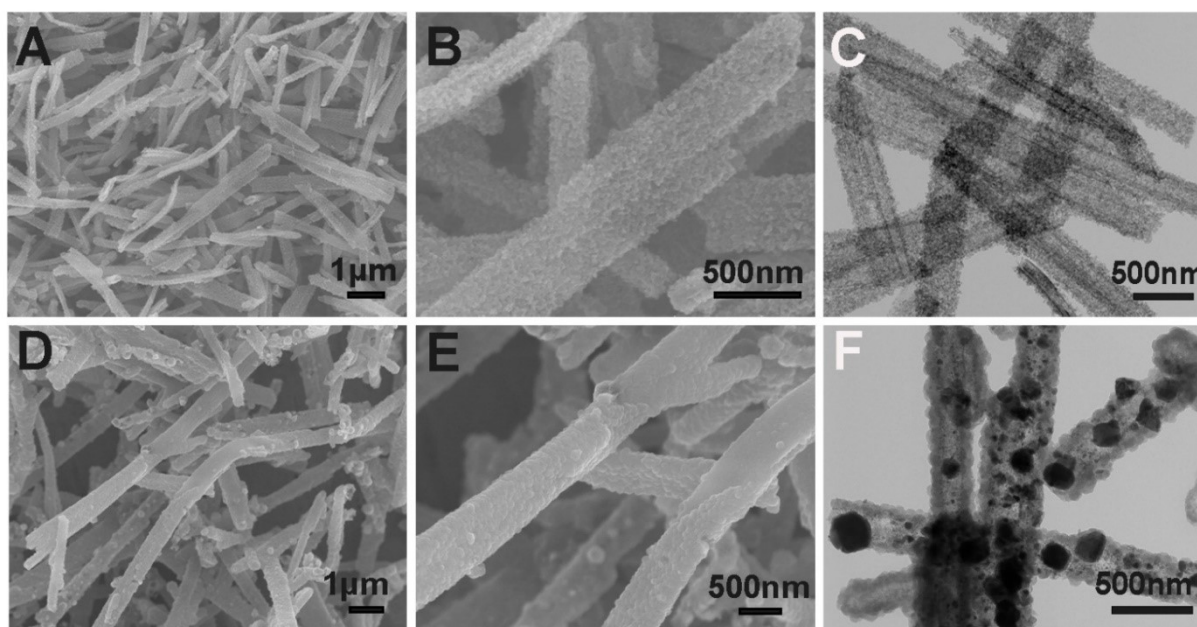

**Fig. S3.** SEM images of  $Fe_3O_4@NCMTs-500$  (A, B) and  $Fe_3O_4@NCMTs-900$  (D, E); TEM images of  $Fe_3O_4@NCMTs-500$  (C) and  $Fe_3O_4@NCMTs-900$  (F).
